# Supplementary material for: Causal effect of gut microbiota and diabetic nephropathy: a Mendelian randomization study
Source: Diabetol Metab Syndr. 2024 Apr 24;16:89. doi: 10.1186/s13098-024-01327-7 (PMC11044463; doi:10.1186/s13098-024-01327-7)
Supplement: Supplementary file 1 — Additional file 1: Supplementary Table S1. MR analysis results of casual links between significant gut microbiota and DN. Table S2. Selected and proxy SNPs for each significant gut microbiota. Table S3. Reverse MR analysis of DN on GM. Table S4. Sensitivity analysis for reverse MR analysis. Table S5. Mapped gene by all significant bacterial taxa related SNPs. Table S6. Transcriptome MR results of causality of mapped genes and DN. Table S7. Heterogeneity and pleiotropy test results for transcriptomic analysis. [file 13098_2024_1327_MOESM1_ESM.xlsx]

## Sheet: Catologue
Table S1. MR analysis results of casual links between significant gut microbiota and DN.
Table S2. Selected and proxy SNPs for each significant gut microbiota.
Table S3. Reverse MR analysis of DN on GM.
Table S4. Sensitivity analysis for reverse MR analysis.
Table S5. Mapped gene by all significant bacterial taxa related SNPs.
Table S6. Transcriptome MR results of causality of mapped genes and DN.
Table S7. Heterogeneity and pleiotropy test results for transcriptomic analysis.

## Sheet: Table S1
Gut microbiota	nsnps	Method	Beta	OR(95%CI)	P value
Order Bacteroidales	15	MR Egger	0.231	1.260(0.579-2.740)	0.572
		Weighted median	0.466	1.594(1.086-2.341)	0.017
		Inverse variance weighted	0.345	1.412(1.025-1.945)	0.035
		Simple mode	0.6	1.822(1.010-3.288)	0.069
		Weighted mode	0.585	1.794(1.034-3.113)	0.06
Genus Eubacterium ventriosum	17	MR Egger	-0.169	0.845(0.287-2.486)	0.764
		Weighted median	-0.257	0.773(0.565-1.057)	0.107
		Inverse variance weighted	-0.28	0.756(0.594-0.963)	0.023
		Simple mode	-0.235	0.791(0.496-1.259)	0.339
		Weighted mode	-0.239	0.787(0.490-1.263)	0.338
Genus Ruminococcus gauvreauii	11	MR Egger	-1.047	0.351(0.121-1.015)	0.089
		Weighted median	-0.439	0.645(0.445-0.933)	0.02
		Inverse variance weighted	-0.411	0.663(0.506-0.870)	0.003
		Simple mode	-0.589	0.555(0.289-1.065)	0.11
		Weighted mode	-0.594	0.552(0.300-1.014)	0.088
Genus Akkermansia	11	MR Egger	0.301	1.352(0.558-3.275)	0.523
		Weighted median	0.251	1.286(0.897-1.842)	0.171
		Inverse variance weighted	0.371	1.449(1.120-1.875)	0.005
		Simple mode	0.302	1.353(0.801-2.285)	0.287
		Weighted mode	0.246	1.279(0.789-2.073)	0.344
Genus Coprococcus 1	15	MR Egger	0.62	1.858(0.963-3.586)	0.094
		Weighted median	0.438	1.550(1.099-2.184)	0.012
		Inverse variance weighted	0.324	1.382(1.066-1.793)	0.015
		Simple mode	0.491	1.634(0.927-2.883)	0.118
		Weighted mode	0.469	1.599(0.949-2.693)	0.105
Genus Erysipelotrichaceae (UCG003)	17	MR Egger	-0.284	0.753(0.414-1.369)	0.368
		Weighted median	-0.17	0.844(0.630-1.130)	0.257
		Inverse variance weighted	-0.222	0.801(0.644-0.997)	0.047
		Simple mode	-0.13	0.878(0.533-1.448)	0.619
		Weighted mode	-0.143	0.867(0.529-1.420)	0.579
Genus Marvinbryantia	11	MR Egger	0.548	1.729(0.593-5.040)	0.345
		Weighted median	0.234	1.264(0.893-1.789)	0.186
		Inverse variance weighted	0.302	1.353(1.030-1.777)	0.03
		Simple mode	0.214	1.239(0.770-1.992)	0.4
		Weighted mode	0.186	1.205(0.757-1.917)	0.452
Genus Parasutterella	15	MR Egger	-0.568	0.566(0.201-1.598)	0.306
		Weighted median	0.218	1.244(0.931-1.662)	0.14
		Inverse variance weighted	0.243	1.276(1.022-1.593)	0.032
		Simple mode	0.241	1.273(0.767-2.113)	0.37
		Weighted mode	0.233	1.263(0.765-2.084)	0.38

## Sheet: Table S2
Exposure	SNP	Effect allele	Other allele	Gut microbiome			Diabetic nephropathy			Proxy SNP	Target effect allele	Target other allele	F statistic
				Beta	SE	P value	Beta	SE	P value
Order Bacteroidales	rs11146701	A	G	0.0473596	0.010541	7.08228e-06	-0.0345	0.0342	0.3129	-	-	-	20.18
	rs13291169	C	G	0.0689676	0.0148765	3.74579e-06	0.0266	0.0372	0.4743	-	-	-	21.49
	rs17343978	A	C	-0.0552057	0.0120278	8.35928e-06	-0.0247	0.032	0.44	-	-	-	21.06
	rs2032750	T	C	-0.0508393	0.0106807	1.91509e-06	0.0083	0.026	0.7508	-	-	-	22.65
	rs4146051	A	G	-0.107377	0.0245661	8.76426e-06	-0.0328	0.0477	0.4921	-	-	-	19.1
	rs4916508	G	A	-0.0466729	0.0105312	8.47116e-06	-0.0326	0.0261	0.2113	-	-	-	19.64
	rs55773148	G	A	-0.121514	0.0236759	3.89585e-07	-0.0708	0.0575	0.2179	-	-	-	26.34
	rs62531359	T	G	0.0655728	0.0149891	9.08665e-06	0.0135	0.0335	0.6862	-	-	-	19.14
	rs62575403	C	T	0.140055	0.0311128	7.06129e-06	-0.0113	0.0653	0.8632	-	-	-	20.26
	rs72706335	T	C	-0.22241	0.0493458	7.65519e-06	-0.1374	0.0826	0.0963208	-	-	-	20.3
	rs73975615	G	A	-0.207018	0.0442633	1.21616e-06	0.2878	0.1483	0.0522204	-	-	-	21.86
	rs7546249	T	A	-0.0567113	0.0118386	1.54814e-06	0.0002	0.0284	0.9957	-	-	-	22.95
	rs7631304	G	A	-0.0645771	0.0132957	8.36781e-07	-0.0444	0.0363	0.2211	-	-	-	23.59
	rs79585701	A	C	0.0646823	0.0149628	9.98589e-06	0.0903	0.0371	0.01495	-	-	-	18.69
	rs929878	C	T	-0.0548532	0.012153	4.73377e-06	-0.0426	0.0315	0.1762	-	-	-	20.37
Genus Eubacterium ventriosum	rs11617697	A	G	-0.143349	0.0286241	7.21757e-07	0.0501	0.0568	0.3781	-	-	-	25.08
	rs12964517	G	A	0.0587198	0.0123453	2.07499e-06	-0.0179	0.0287	0.5319	-	-	-	22.62
	rs13082419	C	T	-0.0715522	0.016137	9.55987e-06	0.0778	0.0412	0.0590595	-	-	-	19.66
	rs16884680	G	T	-0.0906428	0.0191909	1.73969e-06	0.0046	0.0423	0.913	-	-	-	22.31
	rs35179274	C	T	-0.0627263	0.013786	5.75792e-06	-0.0164	0.0338	0.6264	-	-	-	20.7
	rs3809430	T	C	-0.0548171	0.0118426	3.55317e-06	0.0248	0.0281	0.3768	-	-	-	21.42
	rs57199565	T	C	0.0783394	0.0160257	7.97037e-07	0.0008	0.034	0.9802	-	-	-	23.89
	rs6048195	A	T	-0.0603594	0.011658	2.50324e-07	0.0173	0.0269	0.5203	-	-	-	26.8
	rs66746423	C	T	0.0751501	0.0164978	6.11142e-06	-0.0119	0.0359	0.739701	-	-	-	20.75
	rs66830358	T	A	0.0528752	0.0117972	6.86917e-06	0.0391	0.0263	0.1369	rs35796867	C	T	20.09
	rs6704822	A	G	0.0739179	0.0166705	6.6223e-06	-0.0448	0.0383	0.2416	-	-	-	19.66
	rs72783037	C	A	0.0658926	0.0143747	6.54762e-06	-0.0373	0.0318	0.2414	-	-	-	21.01
	rs73615400	T	C	-0.0956303	0.0193428	9.53613e-07	0.0199	0.0439	0.650401	-	-	-	24.44
	rs73849225	T	C	0.0975711	0.0224388	5.20909e-06	-0.0168	0.0467	0.719	-	-	-	18.91
	rs78250280	G	A	0.0749762	0.0164404	3.35791e-06	-0.0059	0.0371	0.8743	-	-	-	20.8
	rs876734	C	T	-0.0618696	0.0132532	2.88908e-06	0.0168	0.0288	0.5602	-	-	-	21.79
	rs9316536	T	G	-0.0817111	0.0183121	7.83519e-06	0.0323	0.0371	0.3844	-	-	-	19.91
Genus Ruminococcus gauvreauii	rs12079579	A	G	0.0955324	0.0213436	5.03725e-06	-0.071	0.0464	0.1258	-	-	-	20.03
	rs12539819	C	T	0.110654	0.0240684	4.49375e-06	-0.07	0.0527	0.1843	-	-	-	21.13
	rs13188803	T	A	0.0709419	0.0156855	7.27559e-06	-0.0233	0.029	0.4232	-	-	-	20.45
	rs1391597	C	T	0.0590284	0.0124874	1.85964e-06	-0.0026	0.0265	0.9203	-	-	-	22.34
	rs2047242	A	G	-0.067603	0.0133738	2.46372e-07	0.0199	0.0308	0.5176	-	-	-	25.55
	rs2105937	A	G	0.0580215	0.0127806	5.10352e-06	0.0097	0.0272	0.721499	rs35015448	A	G	20.61
	rs2166943	A	C	0.0566974	0.0123497	5.27717e-06	-0.0039	0.0261	0.8813	-	-	-	21.07
	rs289410	G	A	-0.0654926	0.0139101	2.27464e-06	0.074	0.0287	0.0100201	-	-	-	22.16
	rs431418	A	G	-0.094737	0.0210157	5.53667e-06	-0.0179	0.0443	0.685799	-	-	-	20.32
	rs71386687	T	G	0.121037	0.02386	2.90761e-07	-0.0841	0.041	0.0400304	-	-	-	25.73
	rs73802842	C	A	0.0736808	0.0169665	7.48026e-06	-0.0396	0.0303	0.1921	-	-	-	18.86
Genus Akkermansia	rs11184341	G	C	0.0655855	0.0142236	4.06353e-06	-0.0061	0.0289	0.8327	-	-	-	21.26
	rs111862613	T	C	0.0911199	0.0196748	3.39236e-06	0.0034	0.0346	0.9215	-	-	-	21.45
	rs117107102	A	G	0.204406	0.0431629	3.01139e-06	0.0464	0.0604	0.442	-	-	-	22.42
	rs11729256	T	C	0.0750473	0.0150184	6.58393e-07	0.0397	0.0344	0.2488	-	-	-	24.97
	rs12908520	G	A	0.061772	0.0130954	2.26482e-06	0.025	0.0261	0.3382	-	-	-	22.25
	rs2602429	C	T	0.0745352	0.0156201	2.71569e-06	0.0904	0.0295	0.00216701	-	-	-	22.77
	rs4242783	G	A	0.0685454	0.0147701	2.99799e-06	0.0178	0.0288	0.5369	-	-	-	21.53
	rs61779207	G	A	-0.0760539	0.0167769	6.32116e-06	-0.0447	0.0311	0.1508	-	-	-	20.55
	rs74542928	T	C	0.112623	0.0236434	1.4802e-06	0.0947	0.0605	0.1178	-	-	-	22.69
	rs9349825	A	G	-0.0703407	0.0147133	2.59886e-06	0.0187	0.0331	0.5727	-	-	-	22.85
	rs941682	G	A	-0.0632957	0.0143777	9.17126e-06	0	0.0289	0.9988	-	-	-	19.38
Genus Coprococcus 1	rs1010560	C	A	0.0580232	0.0122722	1.96e-06	-0.0235	0.0292	0.4205	-	-	-	22.35
	rs12794898	G	T	0.0903299	0.0197212	4.92e-06	0.0507	0.039	0.1941	-	-	-	20.98
	rs12886051	G	C	-0.0521782	0.0118051	8.01e-06	0.0227	0.0282	0.4198	-	-	-	19.53
	rs1519491	T	C	0.0499197	0.0113558	8.95e-06	0.0362	0.0264	0.171	-	-	-	19.32
	rs1576241	A	G	-0.0510343	0.0109535	3.33e-06	-0.0035	0.0266	0.8937	-	-	-	21.71
	rs1762123	C	T	-0.0891532	0.0198554	8.01e-06	-0.0217	0.0426	0.610299	rs4870163	C	T	20.16
	rs2907920	A	G	0.0561173	0.0126824	7.65e-06	0.0083	0.0288	0.7728	-	-	-	19.58
	rs4277593	G	A	-0.0585649	0.0109914	1.14e-07	-0.0255	0.0262	0.3306	-	-	-	28.39
	rs56405618	A	G	-0.08963	0.0186508	1.57e-06	-0.0044	0.0407	0.9133	-	-	-	23.09
	rs73031725	T	C	0.167591	0.0355224	1.98e-06	0.1198	0.0743	0.1067	-	-	-	22.25
	rs73167075	T	C	0.0573137	0.0127573	8.57e-06	-0.0014	0.0316	0.9651	-	-	-	20.18
	rs74101919	T	C	-0.0718989	0.0144651	1.03e-06	-0.0378	0.0416	0.3638	-	-	-	24.7
	rs7784490	C	G	-0.0518543	0.0113136	4.55e-06	0.0534	0.0273	0.0507002	-	-	-	21
	rs946513	C	T	0.205899	0.0460018	8.62e-06	0.0945	0.0628	0.1321	-	-	-	20.02
Genus Erysipelotrichaceae (UCG003)	rs10164067	T	G	-0.10326	0.0212405	1.13086e-06	-0.0399	0.0581	0.4922	-	-	-	23.63
	rs11666127	A	G	-0.0719187	0.0161371	7.90414e-06	-0.0026	0.034	0.938	-	-	-	19.86
	rs11994308	C	T	0.115417	0.0242503	1.32563e-06	-0.0037	0.0455	0.9358	-	-	-	22.65
	rs12251396	A	G	-0.0705399	0.0158766	9.51839e-06	0.0011	0.0359	0.976	-	-	-	19.74
	rs17798136	G	A	0.158818	0.0347674	3.23598e-06	-0.0598	0.0525	0.2543	-	-	-	20.86
	rs28568391	A	G	-0.0583911	0.0118741	6.41953e-07	0.0488	0.026	0.0597806	-	-	-	24.18
	rs4758231	G	T	-0.0551754	0.0122047	6.54912e-06	0.0165	0.0287	0.5659	-	-	-	20.44
	rs59068084	T	G	0.0564772	0.0120224	3.11742e-06	0.024	0.0265	0.3654	-	-	-	22.07
	rs59104037	A	G	-0.0951263	0.0204742	4.48256e-06	0.0145	0.0388	0.7097	-	-	-	21.58
	rs62403464	T	C	-0.0731743	0.0156516	3.43738e-06	0.0387	0.0334	0.2471	-	-	-	21.85
	rs6875357	C	T	0.165673	0.0353831	6.69637e-06	-0.0291	0.0671	0.664899	-	-	-	21.92
	rs73074432	C	T	0.072154	0.0164378	9.9902e-06	-0.0394	0.0414	0.341	-	-	-	19.27
	rs74988980	G	A	-0.133141	0.0348574	8.64276e-06	0.0418	0.0643	0.516	-	-	-	14.58
	rs75949021	T	C	-0.169667	0.0374238	3.57507e-06	0.1114	0.0657	0.0900098	-	-	-	20.55
	rs76502207	T	C	0.144844	0.0289929	6.41121e-07	0.0108	0.0662	0.8711	-	-	-	24.95
	rs79396538	C	G	0.0848148	0.0191146	8.63479e-06	0.035	0.0559	0.531001	-	-	-	19.69
	rs8053479	A	G	-0.0838212	0.0186509	5.83413e-06	0.0104	0.0406	0.798	-	-	-	20.2
Genus Marvinbryantia	rs11620597	T	C	0.119479	0.0271688	7.80178e-06	0.1191	0.0831	0.152	-	-	-	19.34
	rs11645029	G	C	-0.060618	0.0131551	4.14752e-06	-0.0224	0.0259	0.3868	-	-	-	21.23
	rs1187983	C	T	-0.0935456	0.0193174	2.02427e-06	-0.0734	0.0425	0.0842597	-	-	-	23.45
	rs146541147	G	A	0.118845	0.0268423	6.86288e-06	0.1226	0.0721	0.0888403	-	-	-	19.6
	rs2724813	A	G	-0.0840769	0.0167551	6.28451e-07	-0.0245	0.0303	0.4187	-	-	-	25.18
	rs2842896	C	T	-0.0649396	0.0131146	7.25363e-07	0	0.0263	0.9987	-	-	-	24.51
	rs2863363	A	G	0.0634861	0.0136323	3.11281e-06	0.0127	0.03	0.673	-	-	-	21.68
	rs3125832	A	C	0.0679323	0.015012	5.02731e-06	0.0198	0.0311	0.5233	-	-	-	20.47
	rs61884471	G	A	0.124426	0.0248431	1.01163e-06	-0.0014	0.0418	0.9738	-	-	-	25.08
	rs72948274	A	C	-0.126354	0.0272212	3.2591e-06	-0.0229	0.053	0.6655	-	-	-	21.54
	rs8006832	G	T	-0.0952415	0.0216699	6.58083e-06	-0.0321	0.0451	0.4775	-	-	-	19.31
Genus Parasutterella	rs10899911	A	G	-0.0717102	0.0148151	1.15272e-06	-0.0288	0.0306	0.3474	-	-	-	23.42
	rs11715853	G	A	-0.0662952	0.0146114	6.22913e-06	-0.0015	0.0283	0.9573	-	-	-	20.58
	rs1403396	A	T	-0.0756729	0.0159035	2.75519e-06	0.0196	0.0315	0.5342	-	-	-	22.64
	rs2090816	A	C	0.0840967	0.0177315	2.89715e-06	0.0012	0.0338	0.9711	-	-	-	22.49
	rs35055552	T	C	0.109554	0.0235433	3.34853e-06	-0.0274	0.0375	0.4654	-	-	-	21.65
	rs35414597	T	A	-0.0684946	0.0142143	1.51206e-06	0.0291	0.0282	0.3021	-	-	-	23.22
	rs55877868	A	C	-0.104458	0.0228089	2.87068e-06	-0.0045	0.043	0.9171	-	-	-	20.97
	rs6809952	G	A	-0.0684957	0.0150892	8.13349e-06	-0.0087	0.0295	0.766699	-	-	-	20.6
	rs6828768	C	T	0.0636852	0.0132645	1.78328e-06	0.0146	0.0259	0.5733	-	-	-	23.05
	rs7303158	C	T	0.0646859	0.0134256	1.32776e-06	0.0239	0.026	0.3571	-	-	-	23.21
	rs7311004	T	C	-0.0617522	0.0136438	5.92054e-06	-0.0343	0.026	0.1875	-	-	-	20.48
	rs7572229	G	A	0.066273	0.0132736	6.31698e-07	0.0571	0.0259	0.0273899	-	-	-	24.92
	rs78383039	T	C	-0.146315	0.0297119	1.57438e-06	-0.0279	0.0658	0.671901	-	-	-	24.24
	rs8039785	T	G	0.0618345	0.0133	3.62095e-06	0.0261	0.0258	0.3117	-	-	-	21.61
	rs823424	G	A	-0.0713448	0.0156958	4.95295e-06	-0.0238	0.0297	0.423	-	-	-	20.66

## Sheet: Table S3
Exposure	Gut microbiota	nsnps	Method	Beta	SE	P value
Diabetic nephropathy	Order Bacteroidales	9	MR Egger	-0.0498451	0.0910457	0.601065
			Weighted median	0.0142834	0.0401685	0.72215
			Inverse variance weighted	-0.00525309	0.0306942	0.864112
			Simple mode	0.0191692	0.0611716	0.762016
			Weighted mode	0.0282347	0.0609274	0.655413
	Genus Eubacterium ventriosum		MR Egger	0.0124183	0.0994705	0.904157
			Weighted median	-0.0156243	0.0416937	0.707854
			Inverse variance weighted	-0.00956613	0.033684	0.776413
			Simple mode	0.0405238	0.0704182	0.580793
			Weighted mode	0.0369714	0.0671631	0.597027
	Genus Ruminococcus gauvreauii		MR Egger	-0.0392802	0.1059	0.72167
			Weighted median	-0.00534391	0.0475248	0.910471
			Inverse variance weighted	0.00232282	0.0358497	0.948339
			Simple mode	-0.0257791	0.0773423	0.747467
			Weighted mode	-0.00118375	0.0675219	0.986442
	Genus Akkermansia		MR Egger	0.0490093	0.112199	0.675408
			Weighted median	-0.00424316	0.0491356	0.931183
			Inverse variance weighted	-0.0116969	0.03811	0.758901
			Simple mode	-0.0748598	0.0838514	0.39804
			Weighted mode	0.0186759	0.0818924	0.825326
	Genus Coprococcus 1		MR Egger	0.081305	0.0950525	0.420657
			Weighted median	0.0136749	0.0422886	0.746414
			Inverse variance weighted	-0.00690872	0.0321503	0.829855
			Simple mode	0.0152049	0.0646232	0.819898
			Weighted mode	0.0218605	0.0618304	0.732808
	Genus Erysipelotrichaceae (UCG003)		MR Egger	0.12888	0.119958	0.318287
			Weighted median	0.00620602	0.0453218	0.891084
			Inverse variance weighted	0.000872909	0.0412744	0.983127
			Simple mode	0.0212869	0.0603926	0.733588
			Weighted mode	0.0305308	0.0586942	0.61703
	Genus Marvinbryantia		MR Egger	-0.228512	0.145447	0.160154
			Weighted median	0.00769853	0.0593917	0.896865
			Inverse variance weighted	0.00687495	0.0560374	0.902357
			Simple mode	-0.0446504	0.109801	0.694929
			Weighted mode	-0.0492429	0.0944651	0.61629
			IVW random effect model	0.00687494	0.0560374	0.902357
	Genus Parasutterella		MR Egger	0.321254	0.114355	0.0261729
			Weighted median	-0.0737548	0.058735	0.209217
			Inverse variance weighted	-0.00893658	0.0552081	0.871408
			Simple mode	-0.118751	0.112241	0.320953
			Weighted mode	-0.118751	0.105051	0.291054
			IVW random effect model	-0.00893658	0.0552081	0.871408

## Sheet: Table S4
Exposure	Outcome	Heterogeneity				Pleiotropy		MR-PRESSO
		MR Egger		IVW		MR Egger regression		Global Test
		Cochran’s Q	P-value	Cochran’s Q	P-value	Egger intercept	P-value	RSSobs	P-value
Diabetic nephropathy	Order Bacteroidales	5.31116	0.622048	5.5818	0.693961	0.00852903	0.618946	7.14543	0.667
	Genus Eubacterium ventriosum	3.56965	0.827794	3.62482	0.889289	-0.00421146	0.821016	4.52391	0.901
	Genus Ruminococcus gauvreauii	7.05698	0.422971	7.2329	0.511726	0.00799574	0.688665	8.7755	0.547
	Genus Akkermansia	5.47791	0.601849	5.80884	0.668635	-0.01165	0.583125	7.35814	0.684
	Genus Coprococcus 1	4.57522	0.711642	5.54776	0.697743	-0.0168919	0.356899	6.89865	0.724
	Genus Erysipelotrichaceae (UCG003)	9.929	0.192633	11.7526	0.162587	-0.0245114	0.294184	14.3258	0.184
	Genus Marvinbryantia	12.218	0.0936127	17.4074	0.0261355	0.0455092	0.128316	21.2729	0.06
	Genus Parasutterella	6.66227	0.46487	16.0922	0.0410797	-0.0634603	0.0180468	20.6728	0.052
IVW, Inverse variance weighted

## Sheet: Table S5
Order Bacteroidales	Genus Eubacterium ventriosum	Genus Ruminococcus gauvreauii	Genus Akkermansia	Genus Coprococcus 1	Genus Erysipelotrichaceae (UCG003)	Genus Marvinbryantia	Genus Parasutterella
FCRL5	SLC25A24	MPZ	PPIE	CNN3	PIK3CD	DAB1	CYP26B1
FCRL3	STXBP3	SDHC	ZFP69	RWDD3	CAPZB	RCOR3	PDE11A
FCRL2	AKNAD1	FCGR2B	EXO5	ZC3H12D	CDA	TRAF5	C1QTNF7
PAPPA2	GPSM2	FCGR3B	ZNF684	GINM1	GNG5	STX7	CC2D2A
GPR75-ASB3	CLCC1	FCRLA	RIMS3	NUP43	GBP2	TAAR8	FBXL5
SPTBN1	KIAA1324	FCRLB	NFYC	PCMT1	AMPD2	TAAR6	FAM200B
ERBB4	GNAI3	DUSP12	SMARCAD1	ULBP2	LAMTOR5	VNN1	BST1
EPHA3	GSTM4	ATF6	HPGDS	ULBP1	S100A11	VNN3	CD38
MUC4	GSTM2	APC	PDLIM5	CHCHD3	SLC25A44	VNN2	AFF1
ZDHHC19	GSTM1	REEP5	C4orf17	FAM188A	MPZL1	NUDT5	IFNGR1
SLC51A	BCL9	MCC	TRMT10A	SIAE	MYBPH	CDC123	ZNF239
PCYT1A	ACP6	YTHDC2	MTTP	SPA17	CHI3L1	CAMK1D	KRT80
TCTEX1D2	GPR89B	NMB	RP11-766F14.2	NRGN	CYP1B1	CHST1	KRT6A
DLC1	NOP58	SLC28A1	DAPP1	SF3A2	SLC8A1	CTD-2210P24.4	KRT5
COL27A1	FAM117B	PDE8A	DST	GADD45B	BCL2L11	SLC35C1	KRT74
DBH	ICA1L	AKAP13	AKR1C1	GNG7	WIPF1	CRY2	KRT72
ZNF248	CARF	KCTD5	AKR1C2	ZNF554	ALCAM	GYLTL1B	KRT73
ZNF25	CYP20A1	PRSS27	AKR1C3	PANK2	PIK3CB	ZNF408	KRT2
ZNF33A	CD47	SRRM2	TMEM132D	SMOX	ALPK1	NDRG2	KRT1
ZNF37A	KIAA1524	TCEB2	CMC2	PRNP	C4orf21	ZNF219	KRT77
LINC00999	FNDC3B	PRSS21	CENPN	SLC23A2	GOLPH3	TMEM253	KRT79
KLHL1	IL1RAP	ZG16B	ATMIN		MTMR12	UBXN6	KRT8
PSMD7	FAT4		GCSH		ZFR	PLIN4	KRT18
GLG1	CSMD3		BPIFA3		NPR3	PLIN5	EIF4B
RFWD3	NR4A1		AL121901.1		JARID2	CTB-50L17.14	TENC1
MLKL	C12orf44		BPIFA1		DCDC2	LRG1	SOAT2
PITPNM3	SERPINE3		BPIFB1		KAAG1	SEMA6B	ITGB7
DVL2	INTS6		CHMP4B		MRS2		MFSD5
ELP5	DHRS12				ACOT13		ESPL1
	FARP1				DSE		SMAD3
	FSCB				ITGB8		AAGAB
	FRMD6				NCF1		IQCH
	TGM3				CCDC146
	NOP56				FGL2
	NFATC2				FBXL13
	ATP9A				MSRA
					DOCK5
					LETM2
					OSGIN2
					NBN
					TMEM64
					NECAB1
					OTUD6B
					SLC26A7
					PTP4A3
					ZFAND5
					ZDHHC12
					DIP2C
					LARP4B
					AL359878.1
					GTPBP4
					IDI2
					IDI1
					ADARB2
					FRAT2
					CPXM2
					PPFIBP2
					CYB5R2
					EIF3F
					SLC15A3
					PPFIA1
					PLBD1
					DDIT3
					HVCN1
					ARHGEF40
					MDGA2
					MDGA2
					TRIM9
					FOS
					NOP10
					ZNF200
					TRAP1
					ADCY9
					NMRAL1
					CDIPT
					CMTM2
					DPEP3
					ST3GAL2
					SUPT4H1
					SLC16A5
					SLC14A2
					SLC14A1
					DYM
					C18orf32
					RPL17-C18orf32
					RPL17
					PLAUR
					PGLYRP1
					FPR2
					ZNF460
					ZNF543
					ZNF304
					ZNF547
					AC004076.7
					ZNF17
					ZNF749
					ZNF772
					ZNF154
					APMAP
					HCK
					ITGB2
					RGL4
					PIM3

## Sheet: Table S6
Gut microbiota	Mapping gene	nsnps	Method	Beta	OR(95%CI)	P value
Order Bacteroidales	GLG1	29	MR Egger	-0.0146686	0.985(0.831-1.169)	0.867736
			Weighted median	0.069073	1.072(0.918-1.250)	0.380079
			Inverse variance weighted	0.148844	1.160(1.023-1.309)	0.0153991
			Simple mode	0.109324	1.116(0.836-1.488)	0.463153
			Weighted mode	0.0717294	1.074(0.931-1.240)	0.335948
	MLKL	46	MR Egger	0.188557	1.208(1.026-1.421)	0.0278819
			Weighted median	0.22519	1.253(1.100-1.426)	0.000671934
			Inverse variance weighted	0.175481	1.192(1.096-1.296)	3.97515e-05
			Simple mode	0.242634	1.275(1.016-1.599)	0.0414535
			Weighted mode	0.215686	1.241(1.096-1.405)	0.00143537
	RFWD3	55	MR Egger	-0.0767195	0.926(0.828-1.036)	0.187134
			Weighted median	-0.0643145	0.938(0.842-1.044)	0.24105
			Inverse variance weighted	-0.109392	0.896(0.841-0.955)	0.000756466
			Simple mode	-0.220507	0.802(0.675-0.954)	0.0155991
			Weighted mode	-0.0351232	0.965(0.861-1.083)	0.550235
	SLC51A	13	MR Egger	-0.262055	0.769(0.496-1.193)	0.266127
			Weighted median	-0.143851	0.866(0.667-1.124)	0.279849
			Inverse variance weighted	-0.222851	0.800(0.655-0.977)	0.0288475
			Simple mode	-0.292133	0.747(0.479-1.165)	0.222005
			Weighted mode	-0.139761	0.870(0.650-1.163)	0.364816
	TCTEX1D2	41	MR Egger	0.123717	1.132(1.002-1.278)	0.0524737
			Weighted median	0.108523	1.115(1.019-1.220)	0.0180122
			Inverse variance weighted	0.0962279	1.101(1.034-1.172)	0.00266252
			Simple mode	0.0642327	1.066(0.909-1.251)	0.435112
			Weighted mode	0.100169	1.105(1.010-1.210)	0.0362921
	ZDHHC19	40	MR Egger	0.154959	1.168(0.950-1.434)	0.148244
			Weighted median	0.0940812	1.099(0.952-1.268)	0.197719
			Inverse variance weighted	0.196781	1.217(1.101-1.346)	0.000119596
			Simple mode	0.0958717	1.101(0.865-1.401)	0.440773
			Weighted mode	0.102074	1.107(0.949-1.293)	0.203409
Genus Eubacterium ventriosum	ACP6	41	MR Egger	0.0581161	1.060(0.944-1.190)	0.332899
			Weighted median	0.078449	1.082(0.977-1.198)	0.131194
			Inverse variance weighted	0.0874744	1.091(1.021-1.166)	0.00973358
			Simple mode	-0.0240405	0.976(0.828-1.515)	0.776632
			Weighted mode	0.0581288	1.060(0.958-1.172)	0.265454
	FAM117B	68	MR Egger	-0.089023	0.915(0.848-0.987)	0.0248059
			Weighted median	-0.110271	0.896(0.845-0.949)	0.000205414
			Inverse variance weighted	-0.0481201	0.953(0.915-0.992)	0.0190357
			Simple mode	-0.10372	0.901(0.804-1.011)	0.0808353
			Weighted mode	-0.114187	0.892(0.843-0.944)	0.000175076
	GSTM4	62	MR Egger	-0.0355431	0.965(0.892-1.045)	0.38211
			Weighted median	-0.0742332	0.928(0.868-0.993)	0.0301005
			Inverse variance weighted	-0.0527659	0.949(0.906-0.993)	0.0242314
			Simple mode	-0.0331592	0.967(0.859-1.089)	0.585226
			Weighted mode	-0.0524758	0.949(0.885-1.017)	0.144359
	TGM3	17	MR Egger	0.064312	1.066(0.837-1.358)	0.609681
			Weighted median	0.0531732	1.055(0.879-1.265)	0.565993
			Inverse variance weighted	0.171837	1.187(1.012-1.393)	0.0352564
			Simple mode	0.517573	1.678(1.127-2.497)	0.0213469
			Weighted mode	0.0709662	1.074(0.898-1.283)	0.446715
Genus Ruminococcus gauvreauii	APC	6	MR Egger	-0.299934	0.741(0.290-1.894)	0.565076
			Weighted median	-0.475296	0.622(0.393-0.984)	0.0426182
			Inverse variance weighted	-0.410711	0.663(0.458-0.959)	0.0292612
			Simple mode	-0.539149	0.583(0.306-1.112)	0.162373
			Weighted mode	-0.530153	0.589(0.342-1.013)	0.11379
	FCGR2B	76	MR Egger	-0.0442066	0.957(0.889-1.030)	0.243922
			Weighted median	-0.0617084	0.940(0.880-1.005)	0.0686911
			Inverse variance weighted	-0.0586129	0.943(0.900-0.988)	0.0141141
			Simple mode	-0.0479508	0.953(0.871-1.043)	0.302488
			Weighted mode	-0.0544747	0.947(0.889-1.009)	0.0942878
	FCRLB	41	MR Egger	-0.325645	0.722(0.595-0.876)	0.00200681
			Weighted median	-0.211552	0.809(0.703-0.931)	0.00315031
			Inverse variance weighted	-0.16681	0.846(0.767-0.934)	0.000907227
			Simple mode	-0.183931	0.832(0.667-1.038)	0.111163
			Weighted mode	-0.202047	0.817(0.711-0.938)	0.00665748
	REEP5	50	MR Egger	-0.239753	0.787(0.667-0.929)	0.00666311
			Weighted median	-0.171941	0.842(0.741-0.957)	0.00850282
			Inverse variance weighted	-0.116554	0.890(0.818-0.968)	0.00648391
			Simple mode	-0.121985	0.885(0.725-1.081)	0.236368
			Weighted mode	-0.142619	0.867(0.764-0.984)	0.0316681
	SDHC	17	MR Egger	0.0142719	1.014(0.921-1.117)	0.776493
			Weighted median	0.0495348	1.051(0.970-1.138)	0.22543
			Inverse variance weighted	0.064617	1.067(1.001-1.137)	0.0465555
			Simple mode	0.0321135	1.033(0.876-1.217)	0.706734
			Weighted mode	0.0512174	1.053(0.971-1.141)	0.231577
	TCEB2	11	MR Egger	-0.14478	0.865(0.668-1.121)	0.301059
			Weighted median	-0.224207	0.799(0.664-0.962)	0.017748
			Inverse variance weighted	-0.257521	0.773(0.665-0.898)	0.000764444
			Simple mode	-0.295764	0.744(0.548-1.010)	0.087474
			Weighted mode	-0.202725	0.817(0.673-0.991)	0.0676202
Genus Akkermansia	CENPN	8	MR Egger	0.221216	1.248(0.958-1.625)	0.152
			Weighted median	0.16652	1.181(1.016-1.373)	0.0300103
			Inverse variance weighted	0.162201	1.176(1.039-1.332)	0.0106011
			Simple mode	0.149477	1.161(0.918-1.468)	0.252148
			Weighted mode	0.168132	1.183(1.000-1.399)	0.0901741
	CMC2	34	MR Egger	0.238392	1.269(1.102-1.462)	0.00234571
			Weighted median	0.187444	1.206(1.071-1.358)	0.00195149
			Inverse variance weighted	0.1469	1.158(1.066-1.258)	0.000514465
			Simple mode	0.183677	1.202(1.006-1.435)	0.0505464
			Weighted mode	0.183677	1.202(1.077-1.340)	0.00237673
	NFYC	20	MR Egger	-0.188168	0.828(0.586-1.171)	0.300535
			Weighted median	-0.240027	0.787(0.633-0.978)	0.0307439
			Inverse variance weighted	-0.181591	0.834(0.707-0.983)	0.0308182
			Simple mode	-0.259003	0.772(0.545-1.094)	0.161883
			Weighted mode	-0.248032	0.780(0.622-0.980)	0.0456813
	RIMS3	34	MR Egger	0.0607201	1.063(0.875-1.290)	0.544397
			Weighted median	0.104246	1.110(0.945-1.303)	0.202773
			Inverse variance weighted	0.11641	1.123(1.009-1.251)	0.0340677
			Simple mode	0.0787099	1.082(0.865-1.353)	0.495409
			Weighted mode	0.0995866	1.105(0.959-1.273)	0.177157
Genus Coprococcus 1	FAM188A	17	MR Egger	0.0832174	1.087(0.753-1.568)	0.662763
			Weighted median	0.181429	1.199(0.973-1.478)	0.0891725
			Inverse variance weighted	0.181921	1.200(1.028-1.399)	0.020716
			Simple mode	0.121925	1.130(0.829-1.540)	0.451505
			Weighted mode	0.175916	1.192(0.959-1.483)	0.133168
	GINM1	37	MR Egger	0.0881016	1.092(0.955-1.249)	0.207995
			Weighted median	0.0857121	1.089(0.977-1.215)	0.123938
			Inverse variance weighted	0.101342	1.107(1.028-1.192)	0.00734952
			Simple mode	0.137643	1.148(0.941-1.400)	0.182974
			Weighted mode	0.100456	1.106(0.990-1.234)	0.0818819
	NUP43	78	MR Egger	0.116696	1.124(1.032-1.224)	0.00879655
			Weighted median	0.0989994	1.104(1.028-1.186)	0.00689023
			Inverse variance weighted	0.066184	1.068(1.016-1.124)	0.0103361
			Simple mode	0.101157	1.106(0.987-1.240)	0.0858508
			Weighted mode	0.0843421	1.088(1.016-1.165)	0.0184829
	PCMT1	30	MR Egger	-0.201204	0.818(0.651-1.027)	0.0944817
			Weighted median	-0.188451	0.828(0.696-0.986)	0.0342368
			Inverse variance weighted	-0.184283	0.832(0.740-0.935)	0.00195306
			Simple mode	-0.289967	0.748(0.566-0.989)	0.0507981
			Weighted mode	-0.205692	0.814(0.678-0.977)	0.0350931
Genus Erysipelotrichaceae (UCG003)	ALCAM	59	MR Egger	0.046587	1.048(0.954-1.150)	0.333027
			Weighted median	0.0778799	1.081(0.989-1.182)	0.087397
			Inverse variance weighted	0.0854204	1.089(1.029-1.153)	0.00333231
			Simple mode	0.0894209	1.094(0.944-1.266)	0.23736
			Weighted mode	0.0490699	1.050(0.957-1.153)	0.304655
	DOCK5	30	MR Egger	-0.168934	0.845(0.688-1.037)	0.117864
			Weighted median	-0.160611	0.852(0.726-0.999)	0.0491102
			Inverse variance weighted	-0.152268	0.859(0.769-0.961)	0.00816121
			Simple mode	-0.204468	0.815(0.767-0.961)	0.11991
			Weighted mode	-0.167262	0.846(0.727-0.984)	0.0381221
	DPEP3	27	MR Egger	0.109779	1.116(0.924-1.348)	0.26542
			Weighted median	-0.0597188	0.942(0.823-1.078)	0.386632
			Inverse variance weighted	-0.124279	0.883(0.788-0.990)	0.0328305
			Simple mode	-0.0577651	0.944(0.762-1.169)	0.601363
			Weighted mode	-0.0399871	0.961(0.849-1.088)	0.532729
	DSE	82	MR Egger	0.0685177	1.071(0.982-1.168)	0.124776
			Weighted median	0.0553105	1.057(0.985-1.134)	0.124169
			Inverse variance weighted	0.0702247	1.073(1.022-1.126)	0.00462913
			Simple mode	0.013652	1.014(0.909-1.130)	0.806097
			Weighted mode	0.0483123	1.049(0.978-1.126)	0.181743
	FPR2	74	MR Egger	-0.0634018	0.939(0.863-1.021)	0.143815
			Weighted median	-0.0454488	0.956(0.887-1.029)	0.230862
			Inverse variance weighted	-0.0678686	0.934(0.888-0.983)	0.00859893
			Simple mode	-0.0990176	0.906(0.810-1.012)	0.0852353
			Weighted mode	-0.0567479	0.945(0.878-1.016)	0.131999
	PIM3	39	MR Egger	0.0332754	1.034(0.894-1.196)	0.65718
			Weighted median	0.0667941	1.069(0.944-1.211)	0.293898
			Inverse variance weighted	0.101473	1.107(1.023-1.197)	0.0113885
			Simple mode	0.0867502	1.091(0.852-1.395)	0.494342
			Weighted mode	0.0539105	1.055(0.931-1.197)	0.406712
	TRAP1	39	MR Egger	0.000559626	1.001(0.896-1.117)	0.992125
			Weighted median	-0.0611822	0.941(0.858-1.031)	0.191665
			Inverse variance weighted	-0.0668912	0.935(0.880-0.994)	0.0301809
			Simple mode	-0.128596	0.879(0.784-1.026)	0.110568
			Weighted mode	-0.069961	0.932(0.850-1.023)	0.147489
	ZFAND5	25	MR Egger	-0.0171441	0.983(0.626-1.543)	0.941194
			Weighted median	0.177656	1.194(0.945-1.509)	0.136556
			Inverse variance weighted	0.188365	1.207(1.025-1.422)	0.0242346
			Simple mode	0.428583	1.535(0.933-2.374)	0.0658916
			Weighted mode	0.119284	1.127(0.862-1.472)	0.390367
	ZNF304	19	MR Egger	-0.303554	0.738(0.457-1.193)	0.232021
			Weighted median	-0.290473	0.748(0.558-1.002)	0.0517807
			Inverse variance weighted	-0.218192	0.804(0.658-0.983)	0.0331706
			Simple mode	-0.525263	0.591(0.345-1.013)	0.0720103
			Weighted mode	-0.356004	0.700(0.506-0.969)	0.0453648
	ZNF547	9	MR Egger	0.843765	2.325(1.062-5.092)	0.0728167
			Weighted median	0.497725	1.645(1.115-2.427)	0.0121676
			Inverse variance weighted	0.412094	1.510(1.122-2.032)	0.00648172
			Simple mode	0.345494	1.413(0.854-2.338)	0.215723
			Weighted mode	0.472621	1.604(1.082-2.379)	0.0467126
Genus Marvinbryantia	CRY2	32	MR Egger	0.066889	1.069(0.912-1.254)	0.417547
			Weighted median	0.110221	1.117(0.993-1.255)	0.0643593
			Inverse variance weighted	0.102865	1.108(1.016-1.209)	0.0202609
			Simple mode	0.2278	1.256(1.028-1.534)	0.0329659
			Weighted mode	0.100875	1.106(0.978-1.251)	0.119416
	NDRG2	16	MR Egger	-0.151518	0.859(0.615-1.200)	0.388887
			Weighted median	-0.248529	0.780(0.599-1.016)	0.0653944
			Inverse variance weighted	-0.212419	0.809(0.661-0.989)	0.0386744
			Simple mode	-0.0851844	0.918(0.591-1.428)	0.710611
			Weighted mode	-0.240879	0.786(0.598-1.034)	0.1055
	VNN1	101	MR Egger	-0.0125185	0.988(0.936-1.042)	0.649721
			Weighted median	-0.0364206	0.964(0.912-1.020)	0.203883
			Inverse variance weighted	-0.0438139	0.957(0.924-0.992)	0.016091
			Simple mode	-0.0362388	0.964(0.875-1.063)	0.465841
			Weighted mode	-0.0448797	0.956(0.910-1.004)	0.0770751
	VNN2	78	MR Egger	0.070839	1.073(1.007-1.144)	0.0320539
			Weighted median	0.0840105	1.088(1.019-1.161)	0.0113909
			Inverse variance weighted	0.0609316	1.063(1.017-1.110)	0.00647158
			Simple mode	0.0348089	1.035(0.931-1.152)	0.522794
			Weighted mode	0.0778394	1.081(1.023-1.142)	0.00688581
	VNN3	98	MR Egger	0.0906366	1.095(1.011-1.186)	0.0281856
			Weighted median	0.0910274	1.095(1.013-1.184)	0.0217272
			Inverse variance weighted	0.0604092	1.062(1.010-1.117)	0.0178954
			Simple mode	0.0352594	1.036(0.904-1.187)	0.612985
			Weighted mode	0.0913543	1.096(1.018-1.179)	0.0162123
Genus Parasutterella	BST1	72	MR Egger	-0.0898477	0.914(0.833-1.003)	0.0610551
			Weighted median	-0.0906165	0.913(0.836-0.998)	0.0455358
			Inverse variance weighted	-0.110974	0.895(0.844-0.949)	0.000185219
			Simple mode	-0.140326	0.869(0.739-1.022)	0.094675
			Weighted mode	-0.0879222	0.916(0.839-0.999)	0.0523289
	FAM200B	53	MR Egger	0.0443145	1.045(0.953-1.146)	0.349876
			Weighted median	0.0597811	1.062(0.977-1.154)	0.158234
			Inverse variance weighted	0.0964739	1.101(1.042-1.164)	0.000638625
			Simple mode	0.104751	1.110(0.935-1.319)	0.237359
			Weighted mode	0.0624868	1.064(0.979-1.157)	0.147191
	FBXL5	30	MR Egger	-0.0621327	0.940(0.697-1.268)	0.68743
			Weighted median	-0.159722	0.852(0.696-1.044)	0.122164
			Inverse variance weighted	-0.225674	0.798(0.693-0.919)	0.00166687
			Simple mode	-0.317996	0.728(0.513-1.033)	0.0856299
			Weighted mode	-0.185614	0.831(0.678-1.018)	0.0841949
	ITGB7	32	MR Egger	0.100388	1.106(0.976-1.253)	0.126437
			Weighted median	0.192792	1.213(1.076-1.367)	0.00156292
			Inverse variance weighted	0.148581	1.160(1.064-1.265)	0.000750354
			Simple mode	0.319629	1.377(1.106-1.713)	0.00746114
			Weighted mode	0.156467	1.169(1.048-1.304)	0.00850813
	KRT1	90	MR Egger	0.00371836	1.004(0.934-1.079)	0.919912
			Weighted median	-0.0345637	0.966(0.905-1.031)	0.300246
			Inverse variance weighted	-0.0539728	0.947(0.906-0.991)	0.0174141
			Simple mode	0.0402599	1.041(0.925-1.172)	0.507739
			Weighted mode	-0.0311012	0.969(0.912-1.031)	0.322177
	KRT2	9	MR Egger	-0.377696	0.685(0.360-1.304)	0.287608
			Weighted median	-0.568615	0.566(0.410-0.782)	0.000562861
			Inverse variance weighted	-0.485871	0.615(0.481-0.787)	0.000114097
			Simple mode	-0.624185	0.536(0.339-0.845)	0.0278669
			Weighted mode	-0.584811	0.557(0.385-0.806)	0.0146146
	KRT18	5	MR Egger	-2.41462	0.089(0.002-3.471)	0.286471
			Weighted median	-0.595735	0.551(0.384-0.791(	0.00123478
			Inverse variance weighted	-0.497611	0.608(0.431-0.858)	0.00467792
			Simple mode	-0.664635	0.514(0.302-0.876)	0.0707424
			Weighted mode	-0.641181	0.527(0.351-0.789)	0.0359911
	KRT73	82	MR Egger	-0.0609985	0.941(0.878-1.001)	0.0857354
			Weighted median	-0.0797211	0.923(0.861-0.990)	0.0247089
			Inverse variance weighted	-0.062055	0.940(0.898-0.984)	0.00766852
			Simple mode	-0.124735	0.883(0.785-0.993)	0.0407132
			Weighted mode	-0.0942147	0.910(0.855-0.969)	0.00429315
	KRT79	11	MR Egger	-0.778361	0.459(0.254-0.829)	0.0296167
			Weighted median	-0.4064	0.666(0.491-0.903)	0.00893711
			Inverse variance weighted	-0.402881	0.668(0.524-0.853)	0.00121112
			Simple mode	-0.0965982	0.908(0.474-1.740)	0.776923
			Weighted mode	-0.487733	0.614(0.426-0.886)	0.0260797

## Sheet: Table S7
Gut microbiota	Mapping gene	Heterogeneity				Pleiotropy		MR-PRESSO
		MR Egger		IVW		MR Egger regression		Global Test
		Cochran’s Q	P-value	Cochran’s Q	P-value	Egger intercept	P-value	RSSobs	P-value
Order Bacteroidales	GLG1	25.4498	0.549269	31.6989	0.286934	0.0297322	0.0188017	34.0929	0.287
	MLKL	45.9543	0.391193	45.99	0.431005	-0.00230001	0.854288	47.8199	0.45
	RFWD3	48.2176	0.660548	48.6939	0.678527	-0.0076342	0.49309	51.108	0.66
	SLC51A	12.0519	0.359756	12.0954	0.438052	0.00465605	0.84574	14.2021	0.449
	TCTEX1D2	34.0018	0.696965	34.2717	0.725183	-0.00630859	0.606327	35.996	0.729
	ZDHHC19	40.5662	0.357879	40.7897	0.391691	0.00571893	0.649881	42.585	0.41
Genus Eubacterium ventriosum	ACP6	47.2022	0.172348	47.6461	0.189629	0.00831042	0.548281	49.7052	0.234
	FAM117B	78.7107	0.135767	80.5506	0.123724	0.0140836	0.218598	84.6225	0.117
	GSTM4	57.9797	0.549922	58.254	0.576055	-0.00526278	0.602367	59.8404	0.54
	TGM3	20.2507	0.162524	22.0477	0.141656	0.0199395	0.266668	26.8388	0.162
Genus Ruminococcus gauvreauii	APC	2.11382	0.714834	2.17713	0.824133	-0.0099101	0.81374	3.2558	0.826
	FCGR2B	63.2659	0.808803	63.5112	0.82525	-0.00421248	0.62188	64.3437	0.847
	FCRLB	33.2785	0.727741	36.8109	0.614615	0.0237182	0.0676687	37.9039	0.644
	REEP5	48.6184	0.447935	51.4771	0.377041	0.0214229	0.0994561	53.0548	0.383
	SDHC	7.03112	0.95678	8.86286	0.918954	0.0189565	0.195968	9.79871	0.927
	TCEB2	5.98767	0.741151	5.98767	0.741151	-0.0183148	0.321669	8.49883	0.733
Genus Akkermansia	CENPN	2.51922	0.86631	2.76529	0.905833	-0.0134898	0.637506	3.26189	0.932
	CMC2	29.1287	0.612622	31.5815	0.537724	-0.0223107	0.127152	33.1306	0.544
	NFYC	8.21889	0.975197	8.22068	0.984309	0.000837806	0.966669	9.00641	0.986
	RIMS3	28.2924	0.654823	28.7483	0.678889	0.00899258	0.504425	29.5358	0.72
Genus Coprococcus 1	FAM188A	8.68207	0.893546	9.02029	0.912576	0.0139807	0.569497	9.58198	0.931
	GINM1	27.0659	0.828905	27.1192	0.857074	0.00261963	0.818717	28.0452	0.865
	NUP43	45.5316	0.99784	47.6285	0.996577	-0.0115658	0.151717	48.5496	0.998
	PCMT1	13.3593	0.991146	13.388	0.994063	0.00246118	0.866665	13.922	0.998
Genus Erysipelotrichaceae (UCG003)	ALCAM	44.484	0.886346	45.5386	0.882777	0.00935844	0.308793	47.9772	0.867
	DOCK5	15.6944	0.970131	15.7308	0.978439	0.00267222	0.850251	16.2566	0.987
	DPEP3	27.1032	0.350747	36.0544	0.0906739	-0.0465938	0.00816678	39.0154	0.099
	DSE	68.0673	0.826752	68.0694	0.84673	0.000427027	0.962865	68.9534	0.859
	FPR2	71.139	0.50654	71.156	0.539269	-0.00108912	0.896618	72.3823	0.538
	PIM3	38.3984	0.405973	39.6263	0.397334	0.0142875	0.283745	41.7619	0.417
	TRAP1	28.8476	0.828632	30.8976	0.786403	-0.0165837	0.160601	31.9041	0.832
	ZFAND5	16.3975	0.837733	17.3185	0.834764	0.0204219	0.347189	19.0132	0.85
	ZNF304	17.4235	0.426048	17.5752	0.483947	0.00777604	0.705203	19.5532	0.508
	ZNF547	6.22913	0.513264	7.58891	0.47462	-0.0383819	0.281764	8.6243	0.576
Genus Marvinbryantia	CRY2	26.1601	0.666936	26.438	0.700086	0.00782018	0.60198	27.7279	0.712
	NDRG2	16.7011	0.272455	16.9485	0.321955	-0.00885587	0.655846	18.3256	0.409
	VNN1	97.4038	0.526546	99.7148	0.489236	-0.011106	0.131651	101.87	0.511
	VNN2	42.9714	0.999195	43.1494	0.999363	-0.00333978	0.674271	44.0259	0.999
	VNN3	89.8629	0.657011	90.7735	0.658667	-0.00752718	0.342344	92.0827	0.678
Genus Parasutterella	BST1	64.0514	0.677581	64.383	0.697461	-0.00489681	0.566595	66.5324	0.699
	FAM200B	47.2461	0.623522	49.1786	0.585546	0.0143231	0.170522	51.6278	0.578
	FBXL5	29.1706	0.403911	30.6945	0.379967	-0.0190255	0.236616	32.8514	0.374
	ITGB7	21.9927	0.854309	23.0807	0.846193	0.011207	0.305256	24.3983	0.875
	KRT1	104.532	0.11025	109.125	0.072582	-0.0173984	0.0524016	111.476	0.077
	KRT2	4.71604	0.69457	4.84342	0.774173	-0.0119775	0.731678	6.16086	0.788
	KRT18	4.17111	0.24357	5.65	0.226856	0.218846	0.378244	7.8397	0.362
	KRT73	86.6584	0.286091	86.6602	0.313178	-0.000304201	0.967804	88.47	0.331
	KRT79	8.54355	0.480428	10.3987	0.406239	0.0366472	0.206301	12.7506	0.444
IVW, Inverse variance weighted; MR-PRESSO, Mendelian Randomization pleiotropy residual sum and outlier.
